# Supplementary material
Source: PubMed Central journal article supplement (PMC343294)
Supplement: 1476-4598-3-4-S1.pdf [file 1476-4598-3-4-S1.pdf]

MDA-MB-453

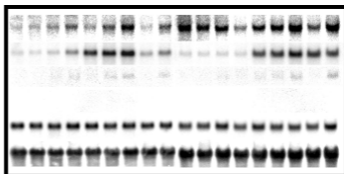

VEGF  
GRP78  
GADD153  
IL-8  
GAPDH  
18srRNA

T47D

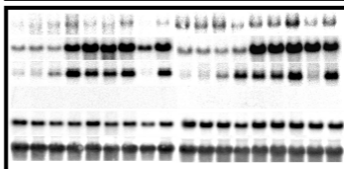

VEGF  
GRP78  
GADD153  
IL-8  
GAPDH  
18srRNA

MDA-MB-231

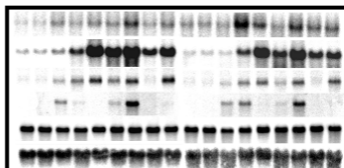

VEGF  
GRP78  
GADD153  
IL-8  
GAPDH  
18srRNA

TSE

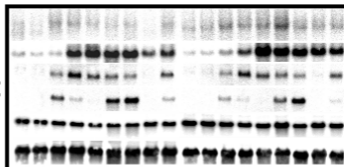

VEGF  
GRP78  
GADD153  
IL-8  
GAPDH  
18srRNA

MCF-7

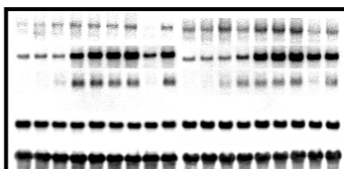

VEGF  
GRP78  
GADD153  
IL-8  
GAPDH  
18srRNA

4Q DMSO -Q  
-Glucose  
Tunicamycin  
Thapsigargin  
A23187  
DTT  
Brefeldin A

4Q DMSO -Q  
-Glucose  
Tunicamycin  
Thapsigargin  
A23187  
DTT  
Brefeldin A

Normoxia Hypoxia
